# Supplementary material for: Effect of Metakaolin and Lime on Strength Development of Blended Cement Paste
Source: MDPI journal article supplement (doi:10.3390/constrmater2040019), 2022-11-14
Supplement: s1 [file s1]

Table S1. Chemical composition of the raw materials

| Sample    | Chemical Composition (wt%) |                                |                  |                                |                 |      |                  |                 |                  |     |
|-----------|----------------------------|--------------------------------|------------------|--------------------------------|-----------------|------|------------------|-----------------|------------------|-----|
|           | CaO                        | Al <sub>2</sub> O <sub>3</sub> | SiO <sub>2</sub> | Fe <sub>2</sub> O <sub>3</sub> | SO <sub>3</sub> | MgO  | K <sub>2</sub> O | CO <sub>2</sub> | H <sub>2</sub> O | LOI |
| OPC       | 65.24                      | 5.07                           | 20.55            | 3.47                           | 1.46            | 1.22 | 0.99             | -               | -                | 2.0 |
| Kaolinite | -                          | 20.9                           | 71.7             | -                              | -               | -    | -                | -               | 7.4              | -   |
| Limestone | 55.44                      | -                              | 1                | -                              | -               | -    | -                | 43.56           | -                | -   |
